# Supplementary material for: Interventions for Improving Long COVID-19 Symptomatology: A Systematic Review
Source: MDPI journal article supplement (doi:10.3390/v14091863), 2022-08-24
Supplement: s1 [file s1]

# Interventions for Improving Long COVID-19 Symptomatology: A Systematic Review

Supplementary Table S1. Risk of bias.

| Entry                                                                       | Hawkins et al., 2022 |                                                                                                                                                                          | D'Ascanio et al., 2021 |                                                                   |
|-----------------------------------------------------------------------------|----------------------|--------------------------------------------------------------------------------------------------------------------------------------------------------------------------|------------------------|-------------------------------------------------------------------|
|                                                                             | Judgement            | Support for judgement                                                                                                                                                    | Judgement              | Support for judgement                                             |
| Random sequence generation (selection bias)                                 | High risk of bias    | Quote: This study was a randomized double blind, placebo controlled trial                                                                                                | High risk of bias      | Quote: This study was a single blinded randomized-clinical trial. |
|                                                                             | Low risk of bias     |                                                                                                                                                                          | Low risk of bias       |                                                                   |
|                                                                             | Unclear risk of bias | Comment:                                                                                                                                                                 | Unclear risk of bias   | Comment:                                                          |
| Allocation concealment (selection bias)                                     | High risk of bias    | Quote: Participants and participant-facing study staff were blinded to allocation of participant                                                                         | High risk of bias      | Quote: Not declared                                               |
|                                                                             | Low risk of bias     |                                                                                                                                                                          | Low risk of bias       |                                                                   |
|                                                                             | Unclear risk of bias | Comment:                                                                                                                                                                 | Unclear risk of bias   | Comment:                                                          |
| Blinding of participants and personnel (performance bias)                   | High risk of bias    | Quote: Each participant received an unbranded bottle of the study oil, labeled with their participant ID. All study oil bottles were identical in color, shape, and size | High risk of bias      | Quote: Only clinicians were blinded                               |
|                                                                             | Low risk of bias     |                                                                                                                                                                          | Low risk of bias       |                                                                   |
|                                                                             | Unclear risk of bias | Comment:                                                                                                                                                                 | Unclear risk of bias   | Comment:                                                          |
| Blinding of outcome assessment (detection bias) (patient-reported outcomes) | High risk of bias    | Quote: To confirm the success of blinding, participants were asked open-ended questions regarding their group assignment after the intervention concluded.               | High risk of bias      | Quote: Personnel was blinded regarding the outcome                |
|                                                                             | Low risk of bias     |                                                                                                                                                                          | Low risk of bias       |                                                                   |
|                                                                             | Unclear risk of bias | Comment:                                                                                                                                                                 | Unclear risk of bias   | Comment:                                                          |
| Incomplete outcome data addressed (attrition bias)                          | High risk of bias    | Quote: Only two participants per group left the study                                                                                                                    | High risk of bias      | Quote: All the participants initially included finished the study |
|                                                                             | Low risk of bias     |                                                                                                                                                                          | Low risk of bias       |                                                                   |
|                                                                             | Unclear risk of bias | Comment:                                                                                                                                                                 | Unclear risk of bias   | Comment:                                                          |
| Selective reporting (reporting bias)                                        | High risk of bias    | Quote:                                                                                                                                                                   | High risk of bias      | Quote:                                                            |
|                                                                             | Low risk of bias     |                                                                                                                                                                          | Low risk of bias       |                                                                   |
|                                                                             | Unclear risk of bias | Comment:                                                                                                                                                                 | Unclear risk of bias   | Comment:                                                          |
